# Supplementary material for: Synthesis of conjugated, hyperbranched copolymers for tunable multicolor emissions in light-emitting diodes
Source: Royal Society of Chemistry journal article supplement (doi:10.1039/c5py00179j), 2015-01-01
Supplement: c5py00179j1.pdf [file c5py00179j1.pdf]

## Supporting Informations

for

### **Synthesis of conjugated, hyperbranched copolymers for tunable multicolor emissions in light-emitting diodes**

Jongho Kim,<sup>a</sup> Juhyeon Park,<sup>b</sup> Sung-Ho Jin,<sup>b</sup> Taek Seung Lee<sup>a,\*</sup>

<sup>a</sup> Organic and Optoelectronic Materials Laboratory, Department of Advanced Organic Materials and Textile System Engineering, Chungnam National University, Daejeon 305-764, Korea

<sup>b</sup> Department of Chemistry Education, Graduate Department of Chemical Materials, and Institute for Plastic Information and Energy Materials, Pusan National University, Busan 609-735, Korea

\* Corresponding author: TSL (tslee@cnu.ac.kr)

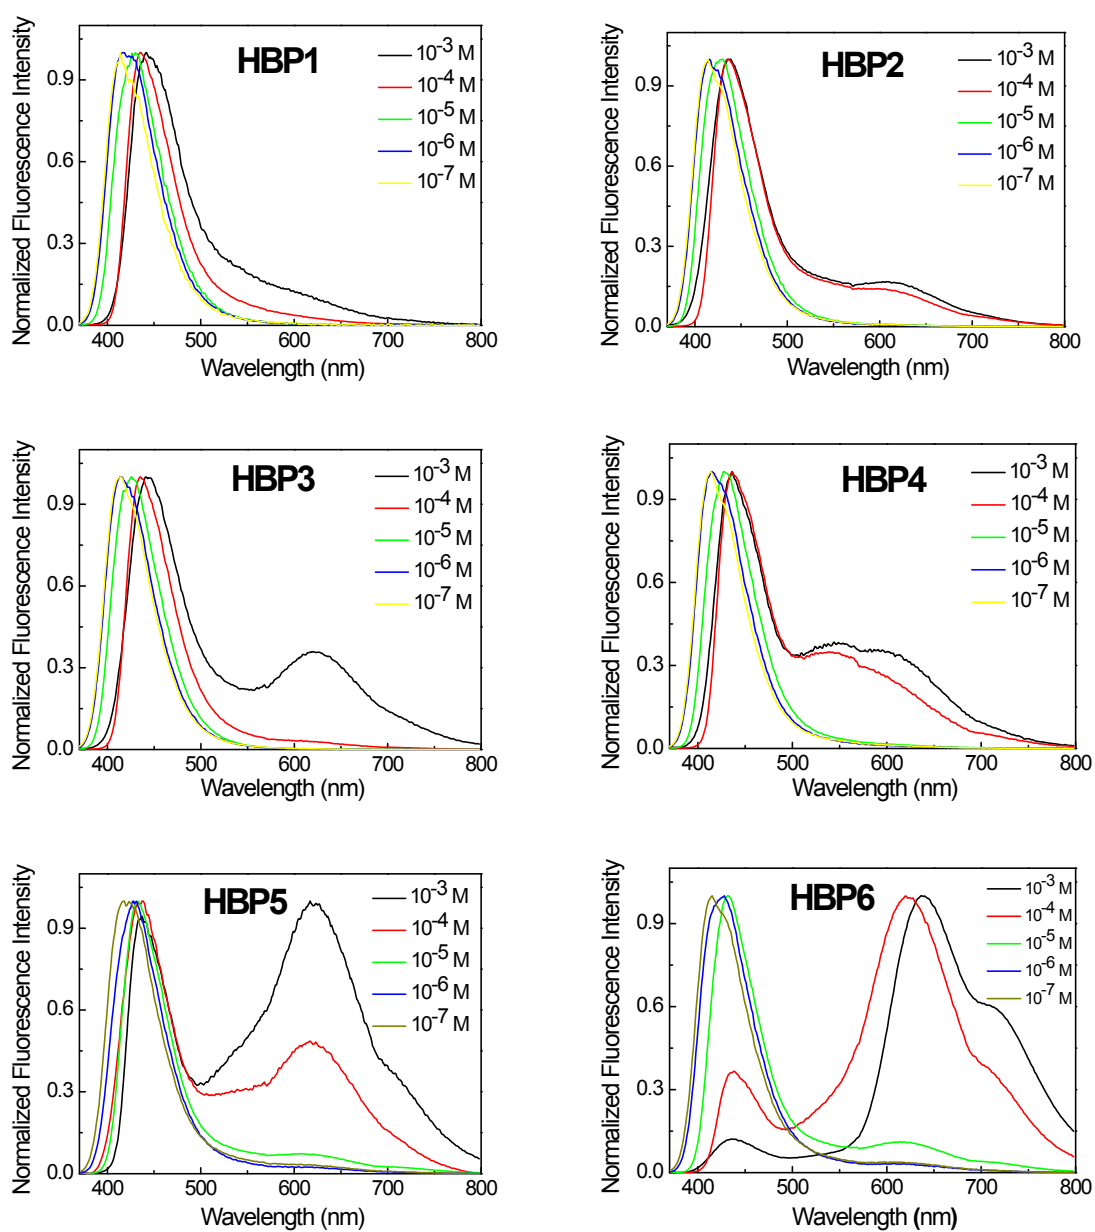

**Fig. S1.** Fluorescence spectra of HBPs in chloroform solutions with various concentrations ( $10^{-3}$  to  $10^{-7}$  M).

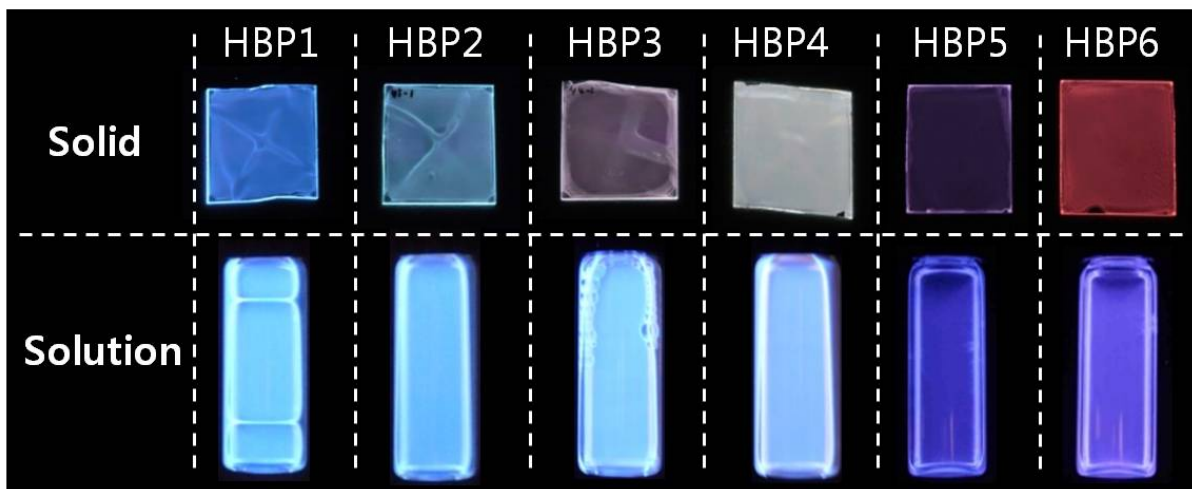

**Fig. S2.** Photographs of HBPs in chloroform solution and in the film state under UV lamp (365 nm).

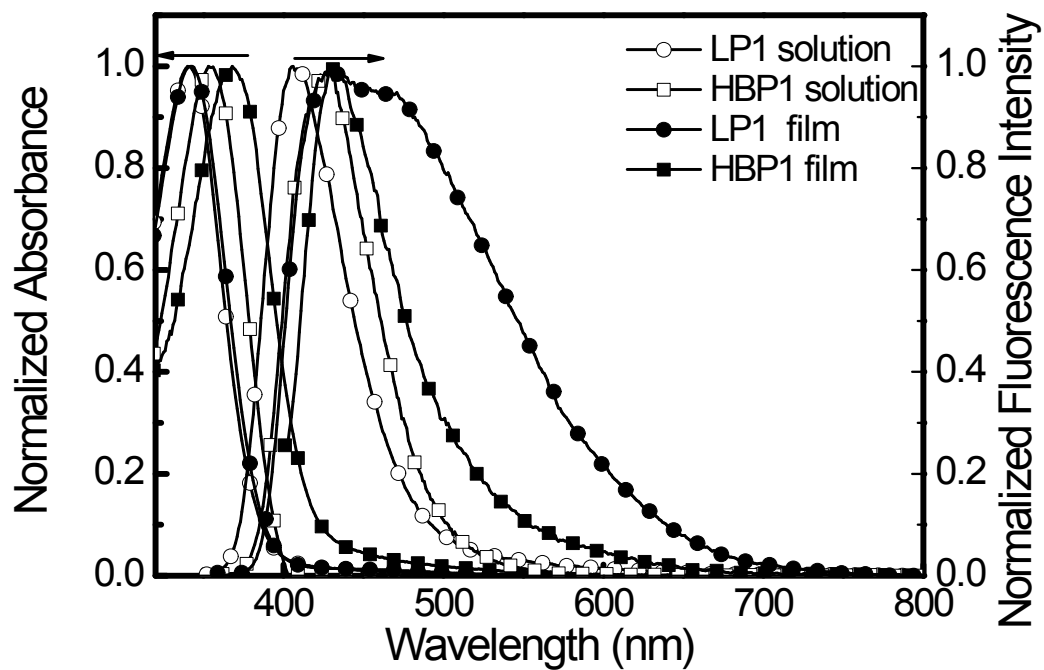

**Fig. S3.** UV-vis absorption and fluorescence spectra of HBP1 and LP1 in chloroform solutions and in the film (spin-cast from 4 wt/v% chloroform solutions).

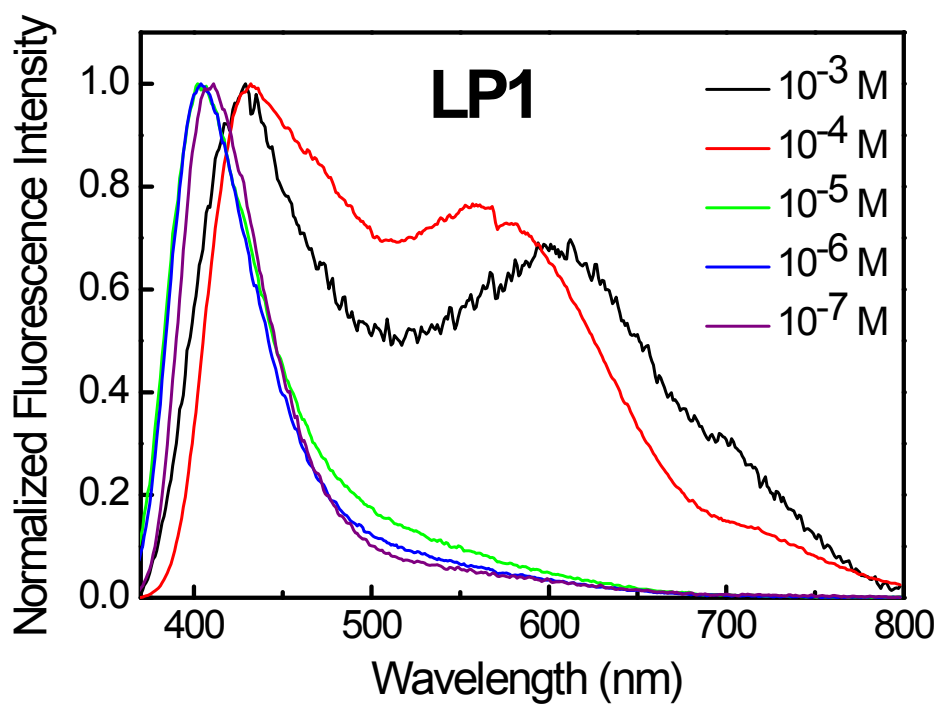

(a)

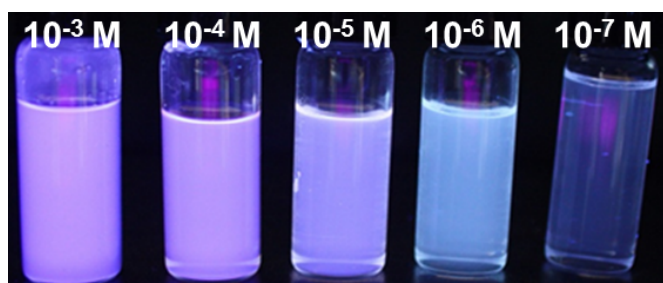

(b)

**Fig. S4.** (a) Fluorescence spectra and (b) photographs of LP1 in chloroform solutions with various concentrations ( $10^{-3}$  to  $10^{-7}$  M).

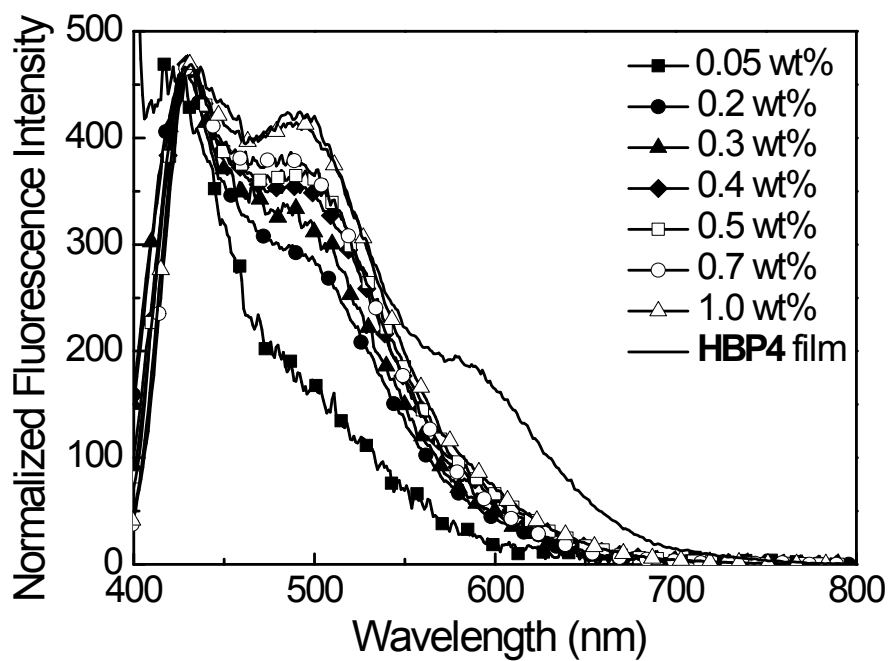

**Fig. S5.** Change in fluorescence spectra of PMMA films containing various concentrations of HBP4 (0.05 to 1 wt% of HBP4 with regard to 0.5 g PMMA).

Excitation wavelength = 368 nm.

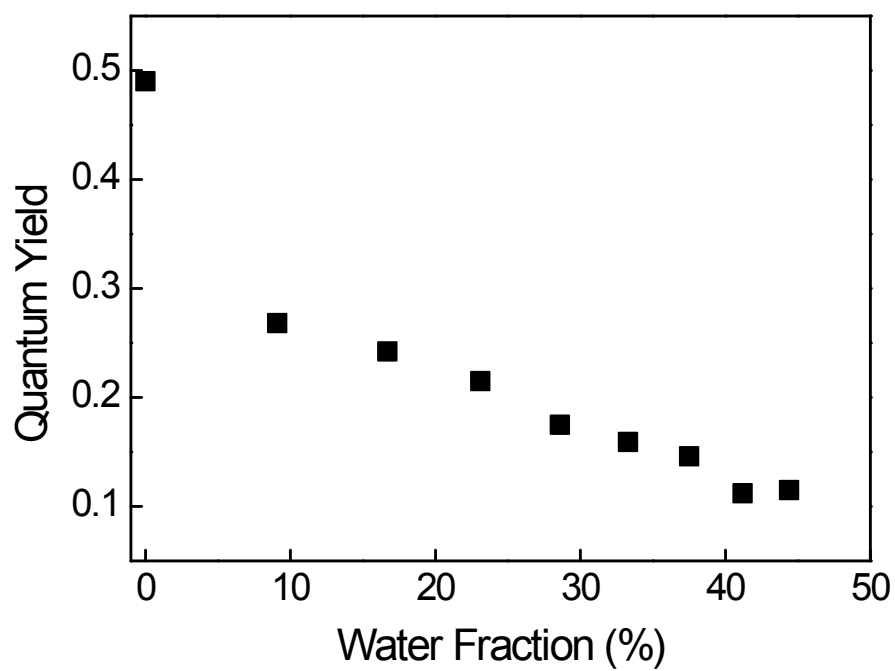

**Fig. S6.** Relationship between QY and fraction of water in THF solution of HBP5.

QYs were determined using rhodamine B as the standard (0.65 in ethanol).

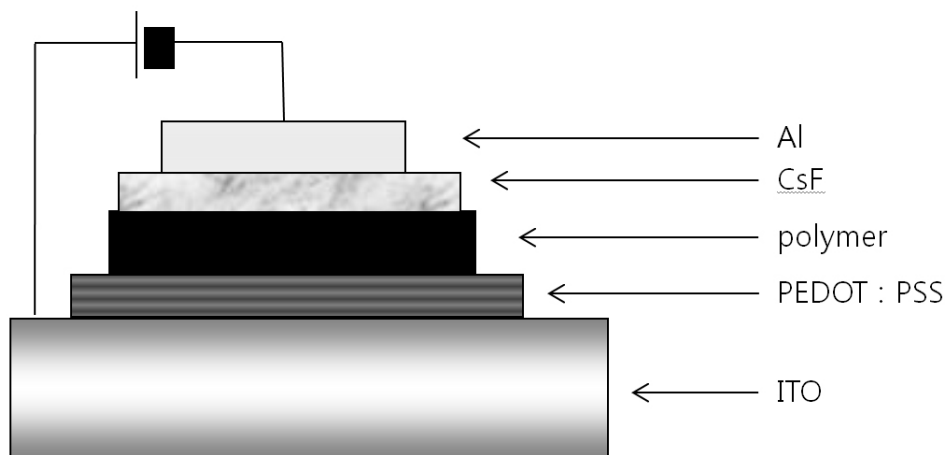

**Fig. S7.** Structure of EL device using the HBPs as emitting layers.



**Table S1.** Optical Properties of the Polymers

| Polymers    | Solution <sup>a</sup> |         | Film <sup>b</sup> |               |
|-------------|-----------------------|---------|-------------------|---------------|
|             | Abs (nm)              | PL (nm) | Abs (nm)          | PL (nm)       |
| <b>HBP1</b> | 348                   | 428     | 360               | 435           |
| <b>HBP2</b> | 355                   | 431     | 370               | 434           |
| <b>HBP3</b> | 353                   | 428     | 365               | 440, 499, 597 |
| <b>HBP4</b> | 354                   | 431     | 373               | 431, 500, 600 |
| <b>HBP5</b> | 355                   | 431     | 365               | 432, 500, 600 |
| <b>HBP6</b> | 354                   | 429     | 365               | 435, 500, 600 |
| <b>LP1</b>  | 340                   | 403     | 340               | 430, 470      |

<sup>a</sup> chloroform solutions ( $1 \times 10^{-7}$  M)

<sup>b</sup> spin-cast from chloroform solutions (4 wt/v%)

**Table S2. Decay times of HBP1 and LP1 in the solid states at 420 nm and at 500 nm upon excitation at 389 nm**

| Polymers    | 420 nm            |                   |          | 500 nm            |                   |          |
|-------------|-------------------|-------------------|----------|-------------------|-------------------|----------|
|             | $\tau_1$ (%) / ns | $\tau_2$ (%) / ns | Avg / ns | $\tau_1$ (%) / ns | $\tau_2$ (%) / ns | Avg / ns |
| <b>HBP1</b> | 0.107 (81)        | 2.602 (19)        | 0.503    | 0.418 (50)        | 2.296 (50)        | 1.357    |
| <b>LP1</b>  | 0.100 (83)        | 0.360 (17)        | 0.144    | 0.351 (63)        | 2.345(37)         | 1.089    |

**Table S3.** Decay times of of HBP4, HBP5 and HBP6 in solutions and in the films at 420 nm and at 500 nm upon excitation at 389 nm

| Polymers | States   | 420 nm            |                   |          | 500 nm            |                   |          |
|----------|----------|-------------------|-------------------|----------|-------------------|-------------------|----------|
|          |          | $\tau_1$ (%) / ns | $\tau_2$ (%) / ns | Avg / ns | $\tau_1$ (%) / ns | $\tau_2$ (%) / ns | Avg / ns |
| HBP4     | Solution | 1.293 (99)        | 7.078 (1)         | 1.351    | 1.026 (15)        | 5.819 (85)        | 5.100    |
|          | Film     | 0.101 (75)        | 1.119( 25)        | 0.356    | 0.981 (79)        | 4.662 (21)        | 1.754    |
| HBP5     | Solution | 0.662 (70)        | 1.108 (30)        | 0.796    | 0.687 (40)        | 2.559 (60)        | 1.810    |
|          | Film     | 0.087 (98)        | 0.900 (2)         | 0.103    | 0.539 (45)        | 2.245 (55)        | 1.477    |
| HBP6     | Solution | 0.562 (54)        | 0.977 (46)        | 0.753    | 0.804 (73)        | 3.847 (27)        | 1.626    |
|          | Film     | 0.007 (86)        | 0.257 (14)        | 0.042    | 0.575 (48)        | 2.207 (52)        | 1.424    |

**Table S4.** Decay times of HBP4 in chloroform solutions with various concentrations at 420 nm and at 500 nm upon excitation at 389 nm

| Concentrations<br>(M) | 420 nm            |                   |          | 500 nm            |                   |          |
|-----------------------|-------------------|-------------------|----------|-------------------|-------------------|----------|
|                       | $\tau_1$ (%) / ns | $\tau_2$ (%) / ns | Avg / ns | $\tau_1$ (%) / ns | $\tau_2$ (%) / ns | Avg / ns |
| $10^{-7}$             | 1.293 (99)        | 7.078 (1)         | 1.351    | 1.026 (15)        | 5.819 (85)        | 5.100    |
| $10^{-6}$             | 0.956 (98)        | 3.251 (2)         | 1.002    | 1.569 (42)        | 5.655 (58)        | 3.939    |
| $10^{-5}$             | 0.958 (98)        | 2.446 (2)         | 0.988    | 1.043 (50)        | 4.053 (50)        | 2.548    |
| $10^{-4}$             | 0.837 (94)        | 2.168 (6)         | 0.917    | 0.877 (62)        | 4.170 (38)        | 2.128    |
| $10^{-3}$             | 0.836 (90)        | 1.582 (10)        | 0.911    | 0.407 (43)        | 3.034 (57)        | 1.904    |
